# Supplementary material
Source: Research Square preprint supplement (doi:10.21203/rs.3.rs-9462624/v1)
Supplement: Supplementary file 1 [file 2bc9f9a3e39e62b54e9c53f1.docx]

**Supporting information for**

**Integrated biological and chemical strategies for sustainable management of *Nigrospora coryli*-induced tobacco leaf spot**

Jingpei Zou1, 2, Liuti Cai1, 2, Yiming Geng1, Mengyu Yin1, Yuguang Mu4, Jingjing Guo5, Hancheng Wang2, *, Feng Zhang1, 3, *

1 State Key Laboratory of Agricultural and Forestry Biosecurity, College of Plant Protection, Nanjing Agricultural University, Nanjing, 210095, China.

2 Guizhou Provincial Academician Workstation of Microbiology and Health, Guizhou Academy of Tobacco Science, Guiyang 550081, China.

3 Sanya Institute, Nanjing Agricultural University, Sanya 572025, China.

4 School of Biological Sciences, Nanyang Technological University, Singapore, Singapore.

5 Centre for Artificial Intelligence Driven Drug Discovery, Faculty of Applied Sciences and Engineering Research Centre of Applied Technology on Machine Translation and Artificial Intelligence, Macao Polytechnic University, Macao 999078, China.

2 These authors contributed equally to this article.

* Corresponding authors.

Email addresses: [fengz@njau.edu.cn](mailto:fengz@njau.edu.cn) (Feng Zhang), [xiaobaiyang126@hotmail.com](mailto:xiaobaiyang126@hotmail.com) (Hancheng Wang).

**Table S1**

Informations of *N. coryli* YB13 and other tabacoo phyllosphere strains.

| **Strain** | **Taxonomic status** | **GenBank accession** |
| --- | --- | --- |
| YB13 | *Nigrospora globosa* | MK329122.1 |
| TBX4 | *Bacillus halotolerans* | PX369440 |
| SLB2-1 | *Pseudomonas oryzihabitan* | OR756234 |
| SLB5-3 | *Pseudomonas syringae pv. angulata* | AF461554 |
| CXB | *Alternaria alternata* | OR258346 |
| CMB1-2-1 | *Epicoccum latusicollum* | OR428532 |
| WZ-45 | *Corynespora cassiicola* | OR764799 |
| ZY14 | *Fusarium oxysporum* | [LR025144](https://www.ncbi.nlm.nih.gov/nucleotide/LR025144.1?report=genbank&log$=nucltop&blast_rank=1&RID=D2NZWP8U015) |
| MGM | *Aspergillus niger* | PX370055 |
| HB | *Fusarium nelsonii* | PX370059 |
| ZYX7 | *Nigrospora oryzae* | PX370054 |
| ZYX2 | *Pestalotiopsis microspora* | PX370058 |
| ZYO2 | *Stemphylium lycopersici* | KR911806 |
| ZYX8 | *Penicillium citrinum* | PX370053 |
| ZY18 | *Pseudothielavia terricola* | PX376602 |
| ZYO1 | *Aspergillus niger* | PX370056 |

**Table S2**

Sequencing data statistics for phyllosphere microbial communities from asymptomatic (YB13J) and symptomatic (YB13B) tobacco leaves.

| **Kingdom** | **Sample** | **RawPE** | **Combined** | **Qualified** | **Nochime** | **Base(nt)** | **Avglen(nt)** | **GC** | **Q20** | **Q30** |
| --- | --- | --- | --- | --- | --- | --- | --- | --- | --- | --- |
| Bacteria | YB13J | 104757 | 99216 | 95909 | 94739 | 38501533 | 406.40 | 55.55% | 98.37% | 94.60% |
| YB13B | 99795 | 96399 | 93226 | 91550 | 37919246 | 414.19 | 54.59% | 98.18% | 94.20% |
| Fungi | YB13J | 171306 | 88994 | 87804 | 87653 | 26673034 | 304.30 | 60.79% | 91.06% | 80.50% |
| YB13B | 95127 | 50012 | 49138 | 49058 | 14543762 | 296.46 | 60.37% | 91.35% | 81.21% |

RawPE: raw paired-end reads; Combined: stitched tag sequences; Qualified: tags after filtering low-quality and short reads; Nochime: final effective tags after chimera removal; Base: total bases of effective tags; AvgLen: average length of effective tags; GC: GC content; Q20/Q30: percentage of bases with quality score >20 (error rate <1%) and >30 (error rate <0.1%), respectively.

**Table S3**

Concentration gradients used to determine the sensitivity of *N. coryli* YB13 to four fungicides alone and in mixtures.

| **Fungicide** | **Concentration gradient (μg/mL)** | | | | |
| --- | --- | --- | --- | --- | --- |
| Fludioxonil | 0.50 | 0.1 | 0.02 | 0.004 | 0.0008 |
| Prochloraz-manganese chloride complex | 0.50 | 0.1 | 0.02 | 0.004 | 0.0008 |
| Difenoconazole | 2.5 | 0.50 | 0.1 | 0.02 | 0.004 |
| Fenaminstrobin | 2.5 | 0.50 | 0.1 | 0.02 | 0.004 |
| Fludioxonil:Prochloraz-manganese chloride complex (4:1) | 0.50 | 0.1 | 0.02 | 0.004 | 0.0008 |
| Fludioxonil:Prochloraz-manganese chloride complex (2:1) | 0.50 | 0.1 | 0.02 | 0.004 | 0.0008 |
| Fludioxonil:Prochloraz-manganese chloride complex (1:1) | 0.50 | 0.1 | 0.02 | 0.004 | 0.0008 |
| Fludioxonil:Prochloraz-manganese chloride complex (1:2) | 0.50 | 0.1 | 0.02 | 0.004 | 0.0008 |
| Fludioxonil:Prochloraz-manganese chloride complex (1:4) | 0.50 | 0.1 | 0.02 | 0.004 | 0.0008 |
| Fludioxonil:Difenoconazole (4:1) | 0.50 | 0.1 | 0.02 | 0.004 | 0.0008 |
| Fludioxonil:Difenoconazole (2:1) | 0.50 | 0.1 | 0.02 | 0.004 | 0.0008 |
| Fludioxonil:Difenoconazole (1:1) | 0.50 | 0.1 | 0.02 | 0.004 | 0.0008 |
| Fludioxonil:Difenoconazole (1:2) | 0.50 | 0.1 | 0.02 | 0.004 | 0.0008 |
| Fludioxonil:Difenoconazole (1:4) | 0.50 | 0.1 | 0.02 | 0.004 | 0.0008 |
| Fludioxonil:Difenoconazole (4:1) | 0.50 | 0.1 | 0.02 | 0.004 | 0.0008 |
| Fludioxonil:Difenoconazole (2:1) | 0.50 | 0.1 | 0.02 | 0.004 | 0.0008 |
| Fludioxonil:Difenoconazole (1:1) | 0.50 | 0.1 | 0.02 | 0.004 | 0.0008 |
| Fludioxonil:Fenaminstrobin (4:1) | 0.50 | 0.1 | 0.02 | 0.004 | 0.0008 |
| Fludioxonil:Fenaminstrobin (2:1) | 0.50 | 0.1 | 0.02 | 0.004 | 0.0008 |
| Fludioxonil:Fenaminstrobin (1:1) | 0.50 | 0.1 | 0.02 | 0.004 | 0.0008 |
| Fludioxonil:Fenaminstrobin (1:2) | 0.50 | 0.1 | 0.02 | 0.004 | 0.0008 |
| Fludioxonil:Fenaminstrobin (1:4) | 0.50 | 0.1 | 0.02 | 0.004 | 0.0008 |
| Fludioxonil:Fenaminstrobin (4:1) | 0.50 | 0.1 | 0.02 | 0.004 | 0.0008 |
| Fludioxonil:Fenaminstrobin (2:1) | 0.50 | 0.1 | 0.02 | 0.004 | 0.0008 |
| Fludioxonil:Fenaminstrobin (1:1) | 0.50 | 0.1 | 0.02 | 0.004 | 0.0008 |
| Difenoconazole:Fenaminstrobin (4:1) | 2.5 | 0.50 | 0.1 | 0.02 | 0.004 |
| Difenoconazole:Fenaminstrobin (2:1) | 2.5 | 0.50 | 0.1 | 0.02 | 0.004 |
| Difenoconazole:Fenaminstrobin (1:1) | 2.5 | 0.50 | 0.1 | 0.02 | 0.004 |
| Difenoconazole:Fenaminstrobin (1:2) | 2.5 | 0.50 | 0.1 | 0.02 | 0.004 |
